# Supplementary material for: Spent Yeast Valorization for Food Applications: Effect of Different Extraction Methodologies
Source: MDPI journal article supplement (doi:10.3390/foods11244002), 2022-12-10
Supplement: s1 [file s1]

**Table S1.** P-values of comparison of protein content (% w/w) between different yeast strains.

|                      | <b>Autolysis</b>      | <b>Hydrolysis</b>     | <b>HPH</b>            | <b>Sonic</b>          |
|----------------------|-----------------------|-----------------------|-----------------------|-----------------------|
| <b>CSY vs. ESY1</b>  | $2.57 \times 10^{-7}$ | $3.94 \times 10^{-3}$ | $4.19 \times 10^{-3}$ | 1.00                  |
| <b>CSY vs. ESY2</b>  | $3.43 \times 10^{-9}$ | $2.15 \times 10^{-6}$ | $2.53 \times 10^{-3}$ | $7.98 \times 10^{-1}$ |
| <b>ESY1 vs. ESY2</b> | $2.06 \times 10^{-4}$ | $4.48 \times 10^{-4}$ | $7.71 \times 10^{-1}$ | $8.10 \times 10^{-1}$ |

n (CSY and ESY1) = 6, n(ESY2) = 4

**Table S2.** P-values of comparison of protein content (% w/w) between different extraction methodologies.

|                                  | <b>CSY</b>            | <b>ESY1</b>            | <b>ESY2</b>            |
|----------------------------------|-----------------------|------------------------|------------------------|
| <b>Hydrolysis vs. autolysis</b>  | $6.65 \times 10^{-6}$ | $8.11 \times 10^{-13}$ | $4.44 \times 10^{-12}$ |
| <b>Hydrolysis vs. raw yeast</b>  | $6.57 \times 10^{-1}$ | $7.28 \times 10^{-3}$  | $2.96 \times 10^{-5}$  |
| <b>Hydrolysis vs. HPH</b>        | $7.85 \times 10^{-3}$ | $5.74 \times 10^{-9}$  | $4.30 \times 10^{-11}$ |
| <b>Hydrolysis vs. sonication</b> | $1.31 \times 10^{-2}$ | $4.22 \times 10^{-11}$ | $1.48 \times 10^{-11}$ |
| <b>Autolysis vs. raw yeast</b>   | $1.45 \times 10^{-2}$ | $4.88 \times 10^{-7}$  | $7.93 \times 10^{-9}$  |
| <b>Autolysis vs. HPH</b>         | $3.67 \times 10^{-2}$ | $2.13 \times 10^{-5}$  | $3.37 \times 10^{-3}$  |
| <b>Autolysis vs. sonication</b>  | $2.25 \times 10^{-2}$ | $3.44 \times 10^{-2}$  | $1.60 \times 10^{-1}$  |
| <b>Raw yeast vs. HPH</b>         | $6.69 \times 10^{-1}$ | $1.06 \times 10^{-2}$  | $2.42 \times 10^{-7}$  |
| <b>Raw yeast vs. sonication</b>  | $7.62 \times 10^{-1}$ | $5.36 \times 10^{-5}$  | $4.34 \times 10^{-8}$  |
| <b>HPH vs. sonication</b>        | $9.99 \times 10^{-1}$ | $2.78 \times 10^{-2}$  | $2.38 \times 10^{-1}$  |

n (CSY and ESY1) = 6, n(ESY2) = 4

**Table S3.** P-values of comparison of protein recovery (%) between different yeast strains.

|                      | <b>Autolysis</b>      | <b>Hydrolysis</b>     | <b>HPH</b>            | <b>Sonic</b>          |
|----------------------|-----------------------|-----------------------|-----------------------|-----------------------|
| <b>CSY vs. ESY1</b>  | 1.00                  | $6.47 \times 10^{-2}$ | $3.50 \times 10^{-7}$ | $2.23 \times 10^{-6}$ |
| <b>CSY vs. ESY2</b>  | $6.32 \times 10^{-1}$ | $9.34 \times 10^{-1}$ | $9.14 \times 10^{-2}$ | $8.07 \times 10^{-2}$ |
| <b>ESY1 vs. ESY2</b> | $6.18 \times 10^{-1}$ | $1.83 \times 10^{-1}$ | $9.48 \times 10^{-8}$ | $2.88 \times 10^{-4}$ |

n (CSY and ESY1) = 6, n(ESY2) = 4

**Table S4.** P-values of comparison of protein recovery (%) between different extraction methodologies.

|                                  | <b>CSY</b>            | <b>ESY1</b>           | <b>ESY2</b>           |
|----------------------------------|-----------------------|-----------------------|-----------------------|
| <b>Hydrolysis vs. autolysis</b>  | $9.98 \times 10^{-1}$ | $1.32 \times 10^{-1}$ | $1.47 \times 10^{-1}$ |
| <b>Hydrolysis vs. HPH</b>        | $1.86 \times 10^{-1}$ | $8.55 \times 10^{-5}$ | $4.85 \times 10^{-3}$ |
| <b>Hydrolysis vs. sonication</b> | $1.09 \times 10^{-6}$ | $9.13 \times 10^{-1}$ | $3.47 \times 10^{-4}$ |
| <b>Autolysis vs. HPH</b>         | $1.39 \times 10^{-1}$ | $1.52 \times 10^{-2}$ | $1.23 \times 10^{-4}$ |
| <b>Autolysis vs. sonication</b>  | $1.51 \times 10^{-6}$ | $3.65 \times 10^{-2}$ | $1.64 \times 10^{-2}$ |
| <b>HPH vs. sonication</b>        | $2.35 \times 10^{-8}$ | $2.06 \times 10^{-5}$ | $1.45 \times 10^{-6}$ |

n (CSY and ESY1) = 6, n(ESY2) = 4
